# Supplementary material for: Anthropometric cutoff values for predicting metabolic syndrome in a Saudi community: from the SAUDI-DM study
Source: PubMed Central journal article supplement — Ann Saudi Med. 2017 Jan-Feb;37(1):21–30. doi: 10.5144/0256-4947.2017.21 (PMC6148981; doi:10.5144/0256-4947.2017.21), 2017
Supplement: asm-37-1-21-s001.pdf [file asm-37-1-21-s001.pdf]

**Appendix 1.** Prevalence of metabolic risk factors by anthropometric categories among Saudi men and women.

| Metabolic parameters                | BMI categories (kg/m <sup>2</sup> ) |                 |                 |                 | Waist circumference category (cm) |                 |                 |                 |                 | Waist-hip ratio categories |                 |                 |                 |                 |
|-------------------------------------|-------------------------------------|-----------------|-----------------|-----------------|-----------------------------------|-----------------|-----------------|-----------------|-----------------|----------------------------|-----------------|-----------------|-----------------|-----------------|
|                                     | <18.5                               | 18.5-24.9       | 25-29.9         | ≥30             | <80                               | 80-85           | 85-90           | 90-95           | ≥95             | ≤0.80                      | 0.81-0.85       | 0.86-0.90       | 0.91-0.95       | >0.95           |
| <b>Men</b>                          |                                     |                 |                 |                 |                                   |                 |                 |                 |                 |                            |                 |                 |                 |                 |
| Triglyceride                        | 1.28<br>(0.86)                      | 1.58<br>(1.08)  | 1.99<br>(1.47)  | 2.03<br>(1.31)  | 1.53<br>(1.14)                    | 1.65<br>(1.13)  | 1.76<br>(1.19)  | 1.91<br>(1.35)  | 2.06<br>(1.40)  | 1.45<br>(1.01)             | 1.48<br>(0.98)  | 1.82<br>(1.24)  | 1.89<br>(1.33)  | 2.19<br>(2.41)  |
| Elevated Triglyceride (%)           | 20.00                               | 30.10           | 45.40           | 51.10           | 28.40                             | 33.70           | 36.80           | 42.40           | 51.00           | 25.70                      | 26.40           | 40.90           | 43.60           | 36.70           |
| HDL cholesterol                     | 0.98<br>(0.31)                      | 0.93<br>(0.30)  | 0.87<br>(0.28)  | 0.85<br>(0.36)  | 0.95<br>(0.29)                    | 0.91<br>(0.28)  | 0.89<br>(0.34)  | 0.87<br>(0.28)  | 0.85<br>(0.33)  | 0.95<br>(0.28)             | 0.90<br>(0.25)  | 0.90<br>(0.32)  | 0.89<br>(0.37)  | 0.89<br>(0.32)  |
| Reduced HDL cholesterol (%)         | 58.10                               | 70.00           | 76.70           | 80.40           | 66.50                             | 70.20           | 74.20           | 77.20           | 80.40           | 66.30                      | 73.20           | 73.30           | 74.70           | 76.70           |
| Systolic blood pressure             | 111.1<br>(10.0)                     | 116.2<br>(11.6) | 120.6<br>(12.2) | 124.3<br>(14.1) | 114.6<br>(11.1)                   | 117.2<br>(11.3) | 118.5<br>(11.2) | 120.4<br>(12.1) | 123.8<br>(14.1) | 115.0<br>(11.1)            | 115.9<br>(11.2) | 119.1<br>(12.1) | 120.5<br>(12.9) | 120.5<br>(11.2) |
| Diastolic blood pressure            | 71.98<br>(7.77)                     | 75.25<br>(7.77) | 77.77<br>(7.74) | 80.04<br>(8.74) | 74.24<br>(7.73)                   | 75.79<br>(7.25) | 76.51<br>(7.65) | 77.50<br>(7.72) | 79.83<br>(8.65) | 74.07<br>(7.38)            | 75.08<br>(7.72) | 76.72<br>(8.00) | 78.00<br>(8.26) | 75.70<br>(7.66) |
| Elevated blood pressure (%)         | 8.30                                | 20.20           | 33.60           | 48.00           | 16.10                             | 22.00           | 26.00           | 32.10           | 46.80           | 17.20                      | 20.90           | 28.60           | 33.80           | 33.30           |
| Fasting plasma glucose              | 5.15<br>(1.92)                      | 5.48<br>(2.20)  | 5.95<br>(2.78)  | 6.19<br>(2.92)  | 5.45<br>(2.16)                    | 5.44<br>(2.18)  | 5.59<br>(2.07)  | 5.83<br>(2.55)  | 6.24<br>(3.08)  | 5.22<br>(1.92)             | 5.39<br>(1.17)  | 5.67<br>(2.38)  | 5.84<br>(2.42)  | 5.74<br>(2.62)  |
| Elevated fasting plasma glucose (%) | 26.00                               | 33.50           | 43.40           | 47.50           | 31.40                             | 34.90           | 39.40           | 39.50           | 48.30           | 28.00                      | 32.90           | 38.20           | 43.60           | 23.30           |
| <b>≥ 2 risk factors (%)</b>         | <b>21.00</b>                        | <b>33.90</b>    | <b>50.90</b>    | <b>61.70</b>    | <b>29.20</b>                      | <b>37.40</b>    | <b>42.70</b>    | <b>48.20</b>    | <b>61.60</b>    | <b>27.80</b>               | <b>36.70</b>    | <b>42.30</b>    | <b>49.90</b>    | <b>43.30</b>    |

Source: Al-Rubean K, Youssef AM, AlFarsi Y, Al-Sharqawi AH, Bawazeer N, AlOtaibi MT, et al. Anthropometric cutoff values for predicting metabolic syndrome in a Saudi community: from the SAUDI-DM study. Ann Saudi Med 2017; 37(1): 21-30.

| <b>Women</b>                        |                                          |                  |                 |                 |                                          |                 |                 |                 |                 |                                   |                  |                  |                  |                 |
|-------------------------------------|------------------------------------------|------------------|-----------------|-----------------|------------------------------------------|-----------------|-----------------|-----------------|-----------------|-----------------------------------|------------------|------------------|------------------|-----------------|
| <b>Metabolic parameters</b>         | <b>BMI categories (kg/m<sup>2</sup>)</b> |                  |                 |                 | <b>Waist circumference category (cm)</b> |                 |                 |                 |                 | <b>Waist-hip ratio categories</b> |                  |                  |                  |                 |
|                                     | <b>&lt;18.5</b>                          | <b>18.5-24.9</b> | <b>25-29.9</b>  | <b>≥30</b>      | <b>&lt;80</b>                            | <b>80-85</b>    | <b>85-90</b>    | <b>90-95</b>    | <b>≥95</b>      | <b>≤0.80</b>                      | <b>0.81-0.85</b> | <b>0.86-0.90</b> | <b>0.91-0.95</b> | <b>&gt;0.95</b> |
| Triglyceride (mean ±SD)             | 1.09<br>(0.76)                           | 1.28<br>(1.00)   | 1.48<br>(0.95)  | 1.62<br>(0.99)  | 1.28<br>(0.97)                           | 1.37<br>(0.90)  | 1.41<br>(0.86)  | 1.64<br>(1.07)  | 1.68<br>(0.99)  | 1.28<br>(0.95)                    | 1.42<br>(0.95)   | 1.54<br>(1.01)   | 1.60<br>(0.97)   | 1.42<br>(0.65)  |
| Elevated Triglyceride (%)           | 11.50                                    | 18.60            | 27.20           | 33.00           | 18.40                                    | 22.00           | 24.00           | 33.60           | 35.70           | 18.10                             | 24.70            | 29.30            | 31.90            | 27.30           |
| HDL cholesterol                     | 1.12<br>(0.31)                           | 1.08<br>(0.33)   | 1.02<br>(0.31)  | 0.98<br>(0.31)  | 1.09<br>(0.33)                           | 1.03<br>(0.32)  | 1.02<br>(0.30)  | 0.99<br>(0.31)  | 0.96<br>(0.30)  | 1.08<br>(0.31)                    | 1.03<br>(0.31)   | 1.01<br>(0.32)   | 0.99<br>(0.31)   | 1.03<br>(0.33)  |
| Reduced HDL cholesterol (%)         | 72.80                                    | 77.60            | 82.60           | 86.60           | 76.30                                    | 84.00           | 28.90           | 85.30           | 87.50           | 78.30                             | 82.10            | 83.70            | 84.70            | 77.30           |
| Systolic blood pressure             | 107.81<br>(11.73)                        | 111.4<br>(12.1)  | 116.2<br>(13.1) | 120.1<br>(14.8) | 110.9<br>(11.9)                          | 114.5<br>(12.2) | 116.3<br>(12.6) | 119.2<br>(14.1) | 122.4<br>(15.2) | 112.3<br>(12.4)                   | 116.8<br>(14.4)  | 117.5<br>(14.1)  | 118.2<br>(14.5)  | 117.7<br>(14.1) |
| Diastolic blood pressure            | 70.41<br>(7.58)                          | 72.40<br>(7.82)  | 75.25<br>(8.17) | 78.07<br>(9.02) | 72.25<br>(7.63)                          | 74.34<br>(8.08) | 75.50<br>(8.35) | 76.95<br>(9.13) | 78.64<br>(8.99) | 72.94<br>(8.12)                   | 75.85<br>(8.89)  | 75.92<br>(8.72)  | 76.58<br>(8.67)  | 76.41<br>(9.18) |
| Elevated blood pressure (%)         | 5.90                                     | 11.60            | 22.90           | 37.30           | 10.30                                    | 19.00           | 24.20           | 32.40           | 40.90           | 14.20                             | 25.50            | 26.10            | 30.60            | 27.30           |
| Fasting plasma glucose              | 5.03<br>(1.44)                           | 5.22<br>(1.95)   | 5.56<br>(2.31)  | 5.89<br>(2.51)  | 5.20<br>(1.90)                           | 5.42<br>(2.08)  | 5.52<br>(2.17)  | 5.78<br>(2.48)  | 6.01<br>(2.64)  | 5.28<br>(1.89)                    | 5.44<br>(1.98)   | 5.65<br>(2.38)   | 5.76<br>(2.62)   | 5.27<br>(1.75)  |
| Elevated fasting plasma glucose (%) | 21.60                                    | 23.50            | 33.40           | 43.50           | 23.70                                    | 29.40           | 33.20           | 37.90           | 46.80           | 25.80                             | 33.20            | 37.40            | 37.20            | 22.70           |
| <b>≥ 2 risk factors (%)</b>         | <b>19.90</b>                             | <b>26.40</b>     | <b>40.50</b>    | <b>55.50</b>    | <b>25.30</b>                             | <b>37.40</b>    | <b>41.30</b>    | <b>49.20</b>    | <b>59.20</b>    | <b>29.30</b>                      | <b>42.40</b>     | <b>45.20</b>     | <b>46.90</b>     | <b>31.80</b>    |

Values are mean (standard deviation) or percentages.

Source: Al-Rubean K, Youssef AM, AlFarsi Y, Al-Sharqawi AH, Bawazeer N, AlOtaibi MT, et al. Anthropometric cutoff values for predicting metabolic syndrome in a Saudi community: from the SAUDI-DM study. Ann Saudi Med 2017; 37(1): 21-30.
